# Supplementary material for: Elucidating structure–function relationships governing the interfacial response of human mesenchymal stem cells to polydopamine coatings
Source: Royal Society of Chemistry journal article supplement (doi:10.1039/c9tb02188d), 2019-11-11
Supplement: c9tb02188d1.pdf [file c9tb02188d1.pdf]

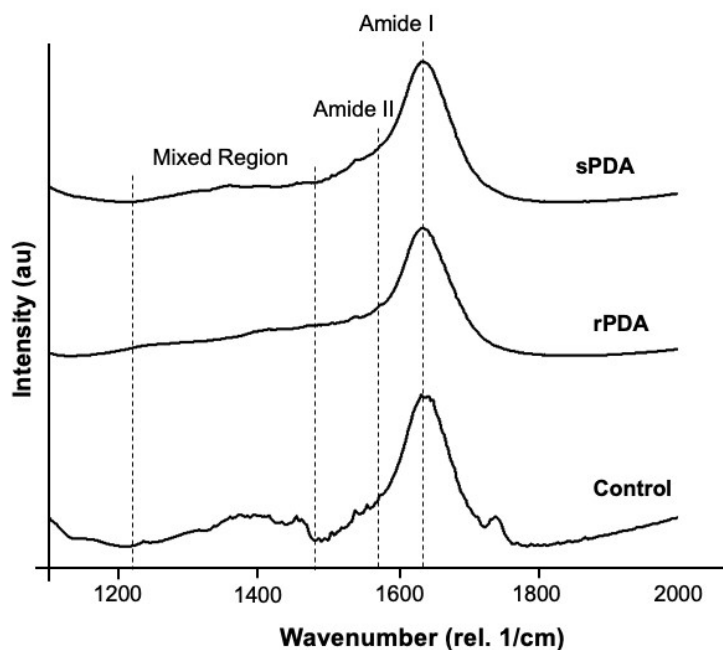

**Figure S1.** Representative ATR-FTIR (Thermo Nicolet Nexus 870 FT-IR spectrometer, Thermo Scientific, United States) spectra of serum proteins pre-adsorbed on control, sPDA and rPDA surfaces after immersion in D-MEM+8% FBS for 6 hours. Prior to FTIR measurements, samples were thoroughly rinsed in deionized water. Absorption bands at  $\sim 1650\text{ cm}^{-1}$  (Amide I) and at  $\sim 1550\text{ cm}^{-1}$  (Amide II) are associated to the secondary structure of proteins. Minor peaks in the mixed region are associated with additional vibrational modes of serum proteins.<sup>29</sup>
